# Supplementary material for: Alirocumab in Pediatric Patients With Heterozygous Familial Hypercholesterolemia: A Randomized Clinical Trial
Source: PubMed Central journal article supplement — JAMA Pediatr. 2024 Feb 5;178(3):283–93. doi: 10.1001/jamapediatrics.2023.6477 (PMC10845038; doi:10.1001/jamapediatrics.2023.6477), 2024-02-05
Supplement: jamapediatr-e236477-s003.pdf [file jamapediatr-e236477-s003.pdf]

## Data Sharing Statement

Santos. Alirocumab in Pediatric Patients With Heterozygous Familial Hypercholesterolemia. *JAMA Pediatr*. Published February 05, 2024. doi:10.1001/jamapediatrics.2023.6477

### Data

**Data available:** No

### Additional Information

**Explanation for why data not available:** Data will be available as requested according to sponsors procedures
